# Supplementary material for: Neuraminidase Inhibitor of Garcinia atroviridis L. Fruits and Leaves Using Partial Purification and Molecular Characterization
Source: MDPI journal article supplement (doi:10.3390/molecules27030949), 2022-01-30
Supplement: s1 [file s1]

# **Supplementary Information**

## Scheme of Extraction and Isolation Methods

### Extraction and Isolation of *Garcinia atroviridis* Fruit (GAF)

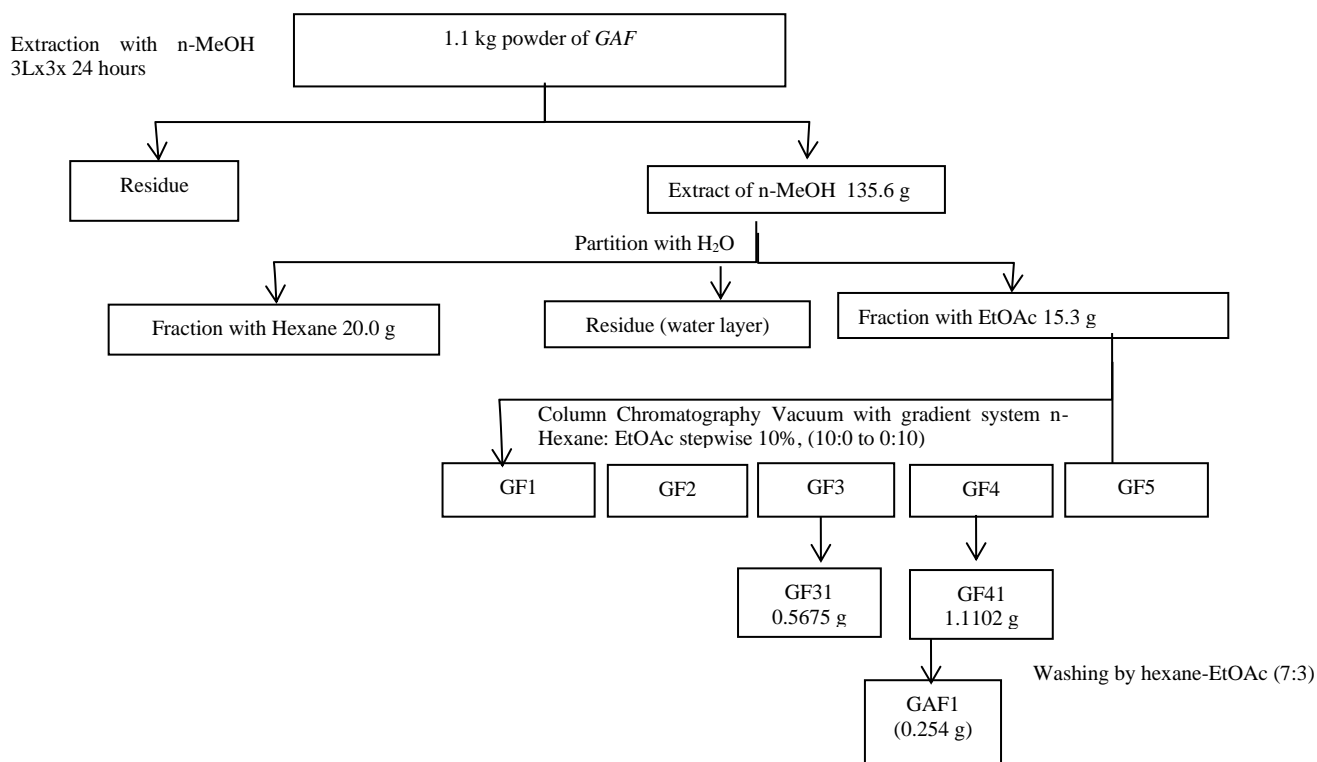

### Extraction and Isolation of *Garcinia atroviridis* Leavs (GAL)

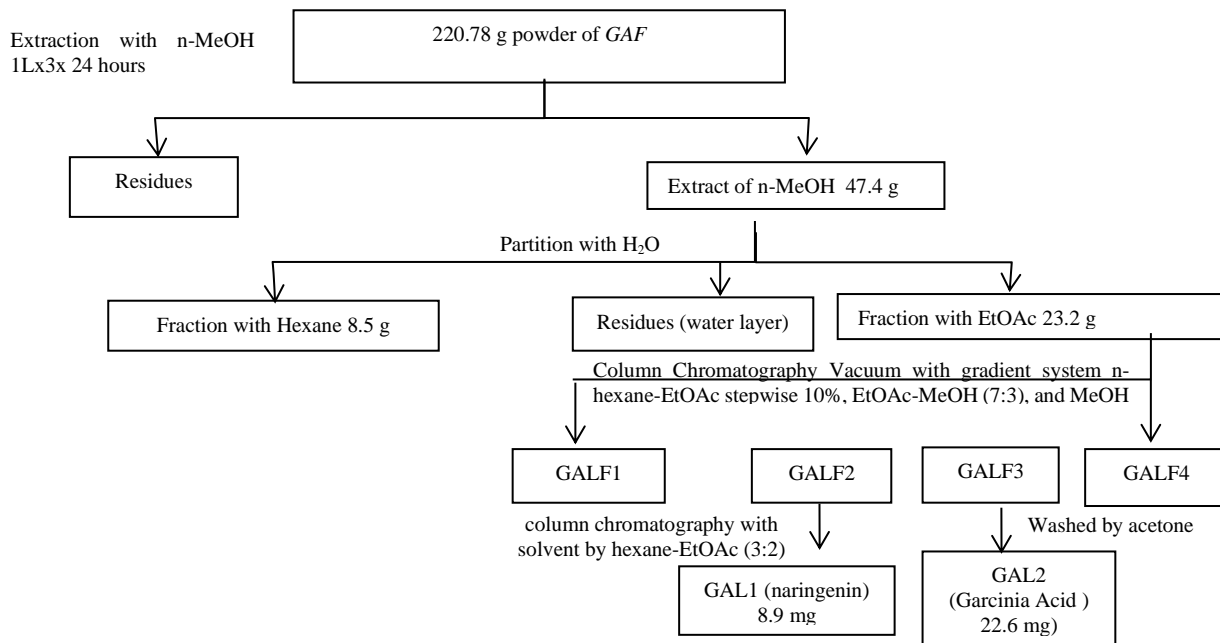

## Spectral Data of Garcinia Acid (GM6 or D2)

GAF1 was obtained as brownish amorphous solid. Melting point of 176–178 °C (178 °C, [23]). GAF1 was characterised as follows:  $[\alpha]_D^{25} = +100^\circ$  (c=1, H<sub>2</sub>O); UV(MeOH),  $\lambda_{\max}$  at 273 nm. IR-max  $\text{cm}^{-1}$ : 3435 (br, OH), 1801, 1762 (C=O). 1120, 1087 (CO-O stretching). ESI-MS m/z 378.99 [2M-H]<sup>+</sup> and ESI (pos)-MS m/z 191.1 [M+H]<sup>+</sup> (calcd for C<sub>6</sub>H<sub>8</sub>O<sub>8</sub>, 190.11). <sup>1</sup>H NMR (500 MHz, MeOD)  $\delta$  ppm 2.72 (d, J=17.50 Hz, H-4a), 3.26 (d, J=17.5 Hz, H-4b), 4.31 (s, 3-OH), 4.92 (1H, H-2). <sup>13</sup>C NMR (500 MHz, MeOD)  $\delta$  ppm 41.06 (s, C-4) 80.78 (C-3) 86.23 (C-2) 170.16 (C-5) 172.77 (C-1') 175.86 (C-2'). These data were consistent with the reported data of garcinia acid (Polavarapu et al., (2011)[33] and Hida et al. (2005)[24]).

**Table S1.** <sup>1</sup>H-NMR, <sup>13</sup>C-NMR, HSQC and HMBC spectroscopy data (solvent MeOD) of GAF1.

| Position | 1D-NMR              |                                                                   | 2D-NMR  |       |            | Ref [2]         |                                                                   |
|----------|---------------------|-------------------------------------------------------------------|---------|-------|------------|-----------------|-------------------------------------------------------------------|
|          | <sup>13</sup> C-NMR | <sup>1</sup> H-NMR                                                | DEPT 90 | HSQ C | HMBC       | <sup>13</sup> C | <sup>1</sup> H                                                    |
| 2        | 86.23               | 4.92 (s, 1H)                                                      | CH      | Yes   | H-4a, H-4b | 84.5            | 4.90 (s, 1H)                                                      |
| 3        | 80.78               | -                                                                 |         |       | H-2        | 79.2            |                                                                   |
| 4        | 41.05               | 2.72 (d, J=17.50 Hz, 1 H, H-4a )<br>3.26 (d, J=17.5 Hz, 1H, H-4b) | -       | Yes   | H-2        | 39.4            | 2.72 (d, J=17.50 Hz, 1 H, H-4a )<br>3.76 (d, J=17.5 Hz, 1H, H-4b) |
| 5        | 170.16              |                                                                   | -       |       | H4b        | 167.0           |                                                                   |
| 1'       | 172.77              |                                                                   | -       |       | H-2        | 170.5           |                                                                   |
| 2'       | 175.86              |                                                                   | -       |       | H-4b       | 170.7           |                                                                   |
| 3-OH     |                     | 4.31 (s, 1H)                                                      | -       |       |            |                 | 3.85 (s, 1H)                                                      |

## Spectral Data of Naringenin (GAL1)

GAL1 had white amorphous with mp 250-253°C (250-252 °C, [25]) . GAF1 was characterised as follows:  $[\alpha]_D^{25} = -100^\circ$  (c=1, MeOH); UV[(MeOH),  $\lambda_{\max}$  ] at 326 and 289. IR-max  $\text{cm}^{-1}$  : 3257, 3404 (br, OH), 1609 (C=O), 2969, 2925 (C=C stretching). ESI-MS m/z: 273  $[\text{M}+\text{H}]^+$  (calcd for  $\text{C}_{15}\text{H}_{12}\text{O}_5$ , 272.25).  $^1\text{H}$  NMR (500 MHz,  $\text{DMSO}-d_6$ )  $\delta$  ppm 2.69 (dd,  $J=17.10, 3.07$  Hz, 1H, H-3eq), 3.27 (dd,  $J=17.18, 12.77$  Hz, 1H, H-3ax), 5.44 (dd,  $J=12.77, 2.84$  Hz, 1H, H-2), 5.89 (s, 1H, H-6), 6.80 (d,  $J=9$ , 1H, H-3', H-5'), 7.31 (d,  $J=9$ , 1H, H-2', H-6'), 8.31 (s, 7-OH), 9.6 (s-5-OH), 12.15 (s, 4'H).  $^{13}\text{C}$  NMR (500 MHz,  $\text{DMSO}-d_6$ ) ppm 41.93 (C-3), 78.39 (C-2), 94.94 (C-8), 95.75 (C-6), 101.73 (C-10), 115.12 (C-3', C-5'), 128.29 (C-2', C-6'), 128.82 (C-1'), 157.68 (C-4'), 162.91 (C-9), 163.44 (C-5), 166.62 (C-7), 196.34 (C-4). These data were consistent with the reported data of naringenin [26,27].

**Table S2.**  $^1\text{H}$ -NMR,  $^{13}\text{C}$ -NMR, HSQC and HMBC spectroscopy data (solvent  $\text{DMSO}-d_6$ ) of GAL1.

| Position | 1D-NMR                   |                                                     | DEPT135<br>DEPT90 | 2D-NMR        | Ref ( $\text{CD}_3\text{OD}$ ) [6] |                                                                                 |
|----------|--------------------------|-----------------------------------------------------|-------------------|---------------|------------------------------------|---------------------------------------------------------------------------------|
|          | $^{13}\text{C}$ -<br>NMR | $^1\text{H}$ -NMR                                   |                   | HMBC          | $^{13}\text{C}$                    | $^1\text{H}$                                                                    |
| 2        | 78.39                    | 5.44, (dd, $J=12.8, 2.8$ , 1H)                      | CH                | H-2', H-3     | 80.5                               | 5.34 (1H, dd, 13.0 Hz, 3.0 Hz)                                                  |
| 3        | 41.93                    | 2.69, (dd, 17.1, 3.1, eq) 3.27 (dd, 17.2, 12.8, ax) | $\text{CH}_2$     |               | 44.0                               | 2.70 (1H, dd, 17.0 Hz, 3.0 Hz, H-3eq)<br>3.10 (1H, dd, 17.0 Hz, 13.0 Hz, H-3ax) |
| 4        | 196.34                   |                                                     |                   | H-3, H-3      | 197.8                              |                                                                                 |
| 5        | 163.44                   |                                                     |                   |               | 165.5                              |                                                                                 |
| 6        | 95.75                    | 5.89 (s, 1H)                                        | CH                | H-8           | 97.1                               | 5.88 (1H, d, 2.0 Hz)                                                            |
| 7        | 166.62                   | -                                                   |                   |               | 168.4                              | -                                                                               |
| 8        | 94.94                    | 5.64 (d, $J=2.2$ , 1H)                              | CH                |               | 96.2                               | 5.90 (1H, d, 2.0 Hz)                                                            |
| 9        | 162.90                   | -                                                   |                   | H-2'          | 164.9                              | -                                                                               |
| 10       | 101.73                   | -                                                   |                   |               | 103.4                              | -                                                                               |
| 1'       | 128.82                   | -                                                   |                   | H-2' H-3' H-2 | 131.1                              | -                                                                               |
| 2'       | 128.29                   | 7.31 (d, $J=9.0$ , 1H)                              | CH                |               | 129.0                              | 7.31 (2H)                                                                       |
| 3'       | 115.12                   | 6.80 (d, $J=9.0$ , 1H)                              | CH                |               | 116.4                              | 6.82 (2H)                                                                       |
| 4'       | 157.68                   | -                                                   |                   | H-2', H-3'    | 159.0                              | -                                                                               |
| 5'       | 115.12                   | 6.80 (d, $J=9.0$ , 1H)                              | CH                | H-3', H-2'    | 116.4                              | 6.82 (2H)                                                                       |
| 6'       | 128.29                   | 7.31 (d, $J=9.0$ , 1H)                              | CH                | H-2, H-2'     | 129.0                              | 7.31 (2H)                                                                       |
| 4'-OH    |                          | 12.15 (s, OH)                                       |                   |               | -                                  | NO                                                                              |
| 5-OH     |                          | 9.6 (s, OH)                                         |                   |               | -                                  | NO                                                                              |
| 7-OH     |                          | 8.31 (s, OH)                                        |                   |               | -                                  | NO                                                                              |

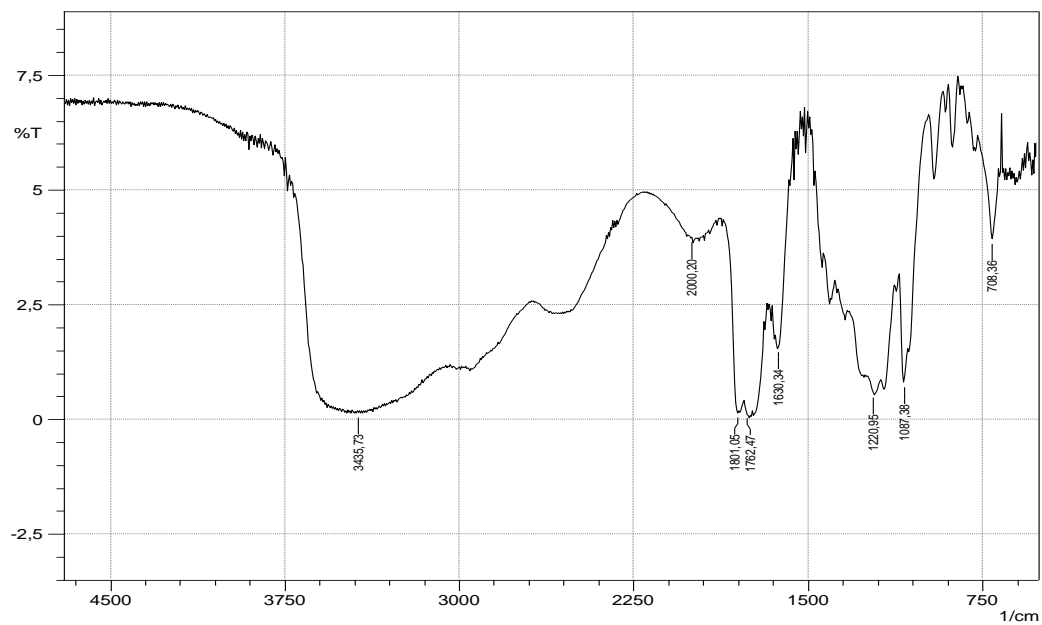

IR spectrum of GAF1 compound that isolated from *G. atroviridis* fruits

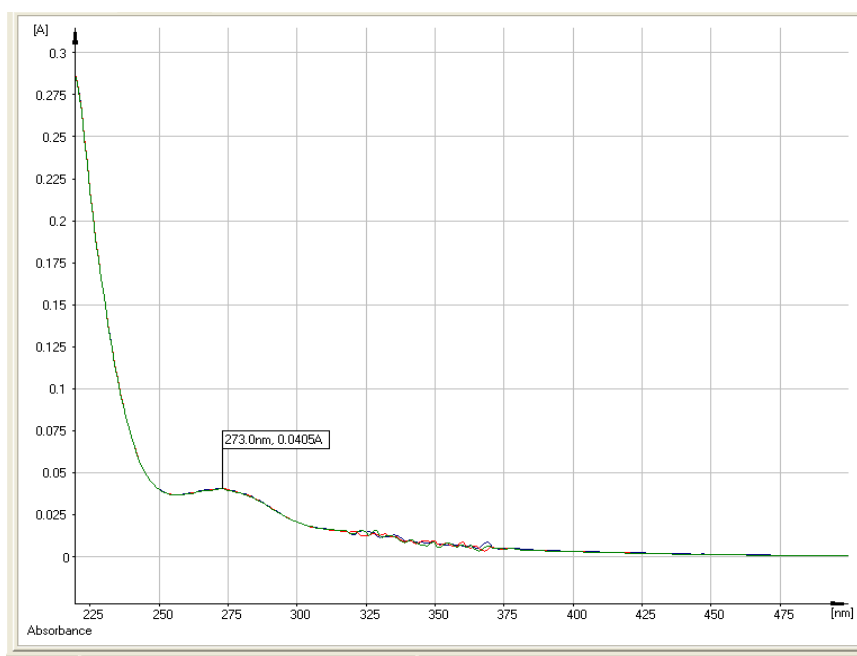

UV spectrum of GAF1 compound that isolated from *G. atroviridis* fruits

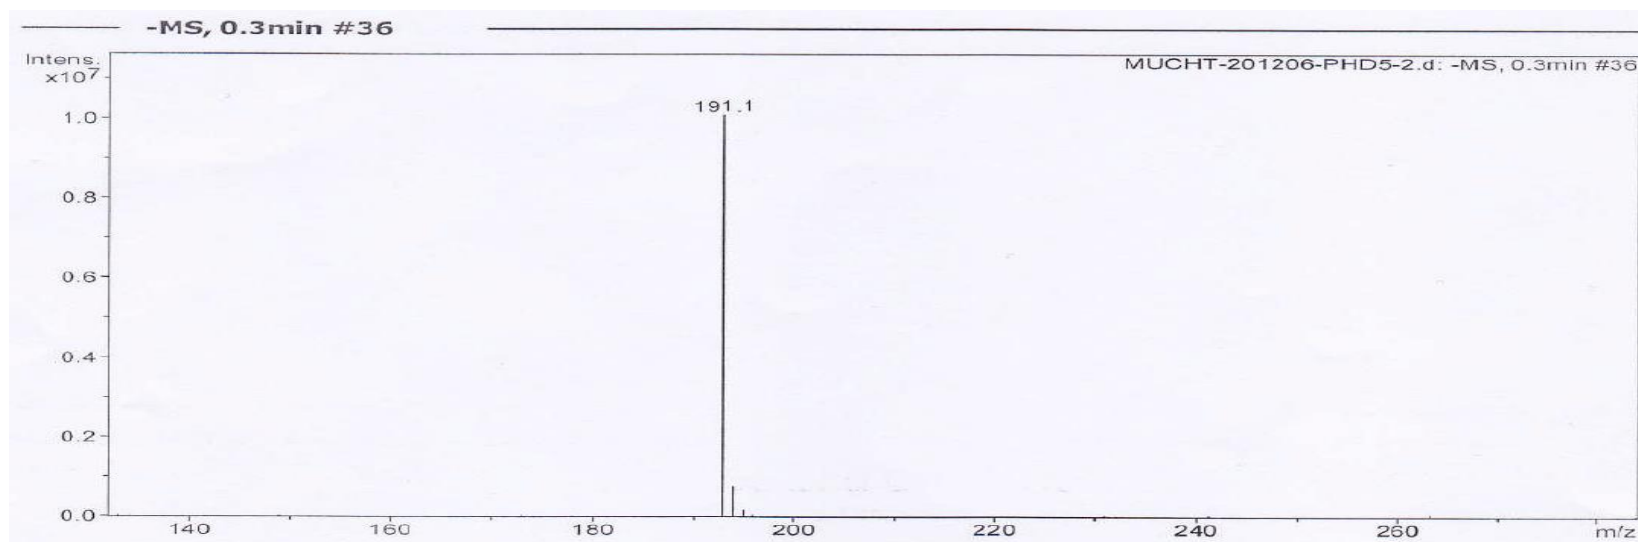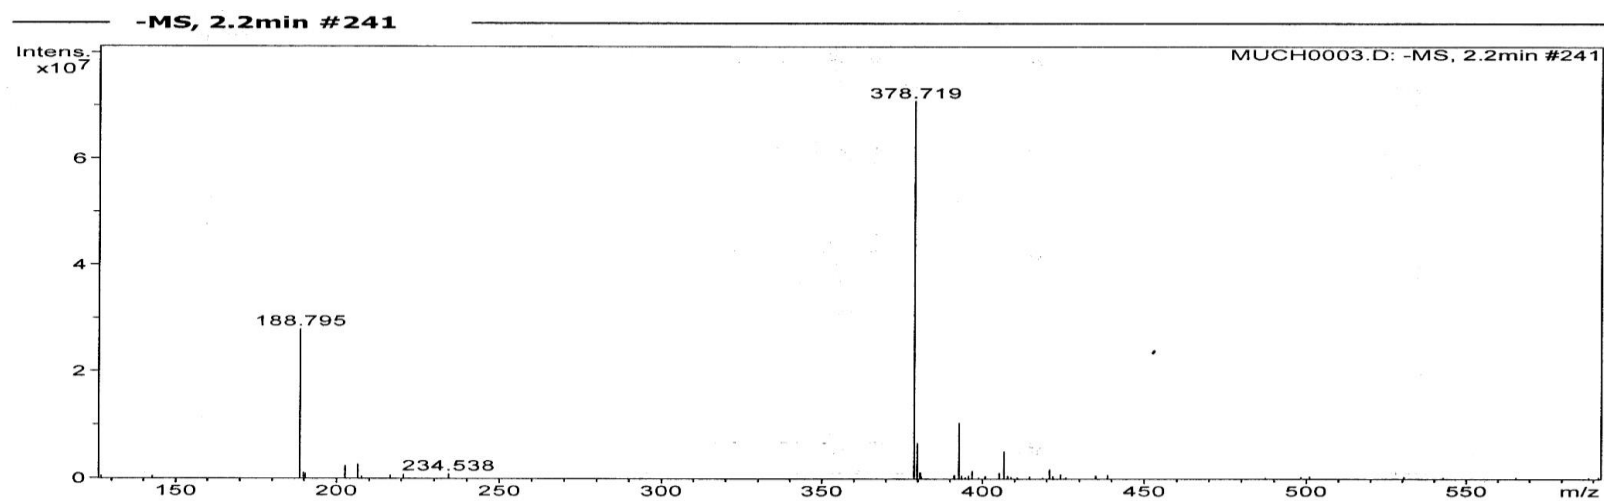

Positive Mode  $[M+H]^+$  and Negative Mode  $[2M-H]^+$  of Mass Spectrum Using ESIMS-Trap-Direct Injection in MeOH of GAF1 compound that isolated from *G. atroviridis* fruits

1H GAF1  
PROTON MeOD C:\NMRExp\HABIBAH\USMFARMASI iconnmr

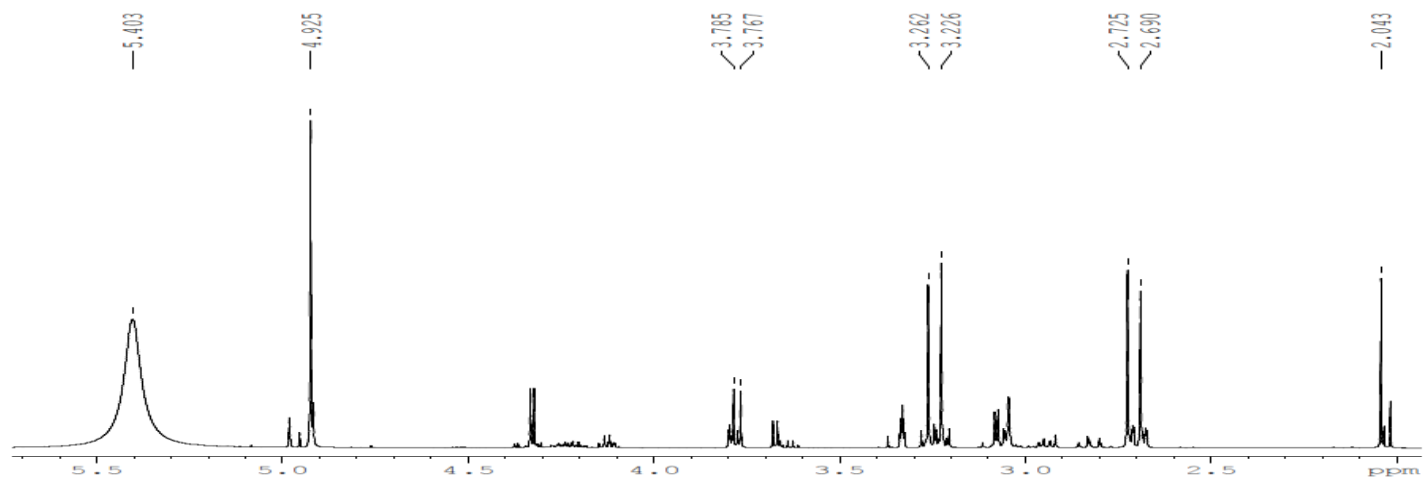

<sup>1</sup>H-NMR spectrum of GAF1 compound that isolated from *G. atroviridis* fruits using CD<sub>3</sub>OD solvent

13C GAF1  
C13CPD MeOD C:\NMRExp\HABIBAH\USMFARMASI iconnmr

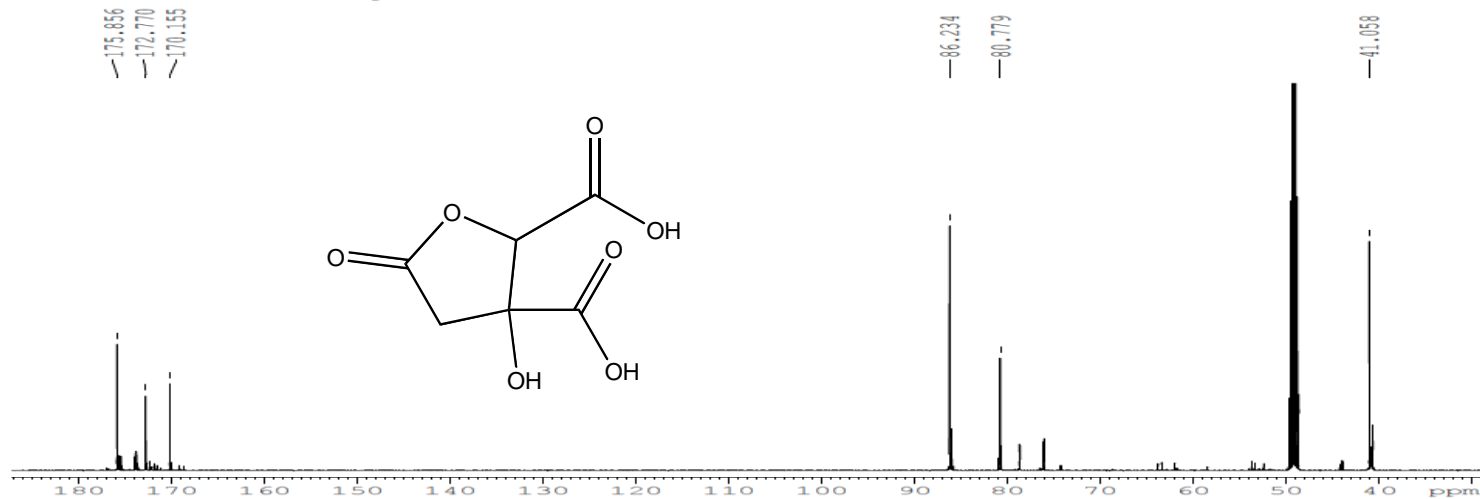

<sup>13</sup>C spectrum of GAF1 compound that isolated from *G. atroviridis* fruits using CD<sub>3</sub>OD solvent

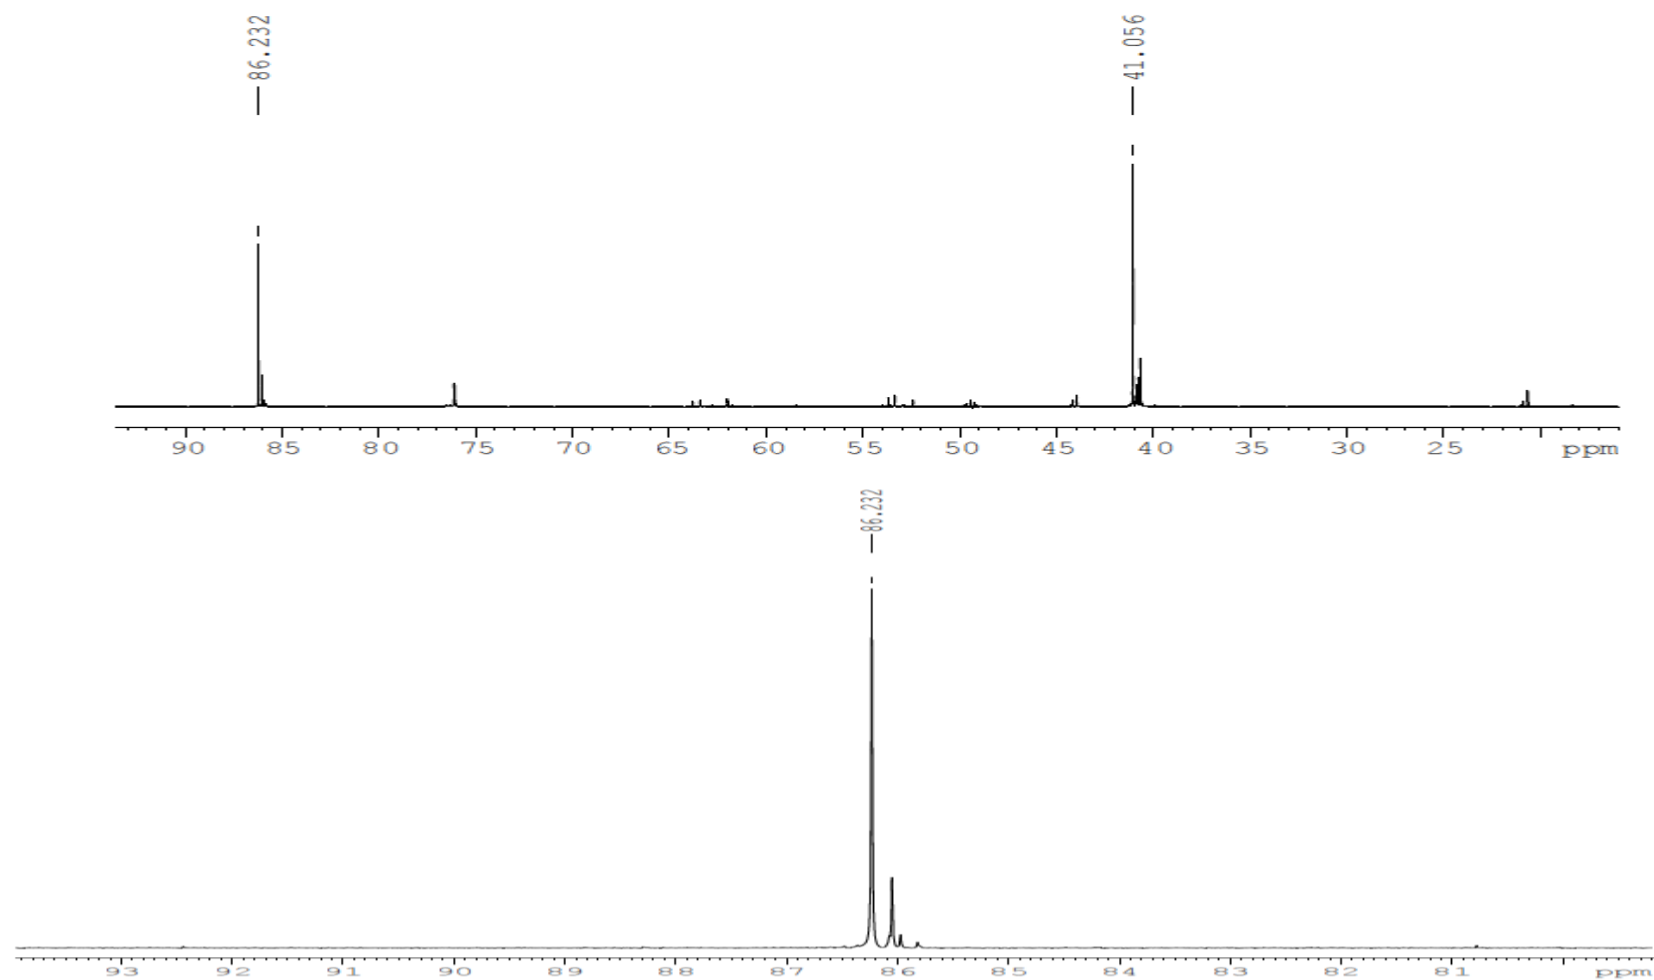

DEPT45 and DEPT90-NMR spectrum of GAF1 compound that isolated from *G. atroviridis* fruits using CD<sub>3</sub>OD solvent



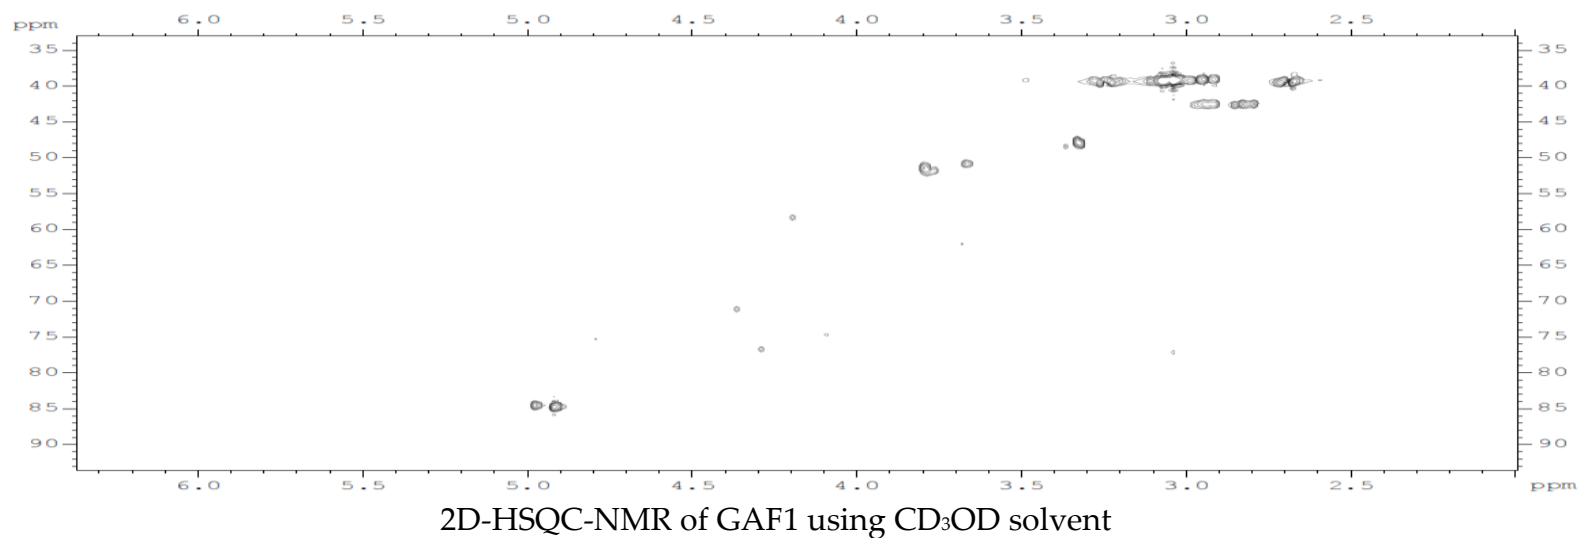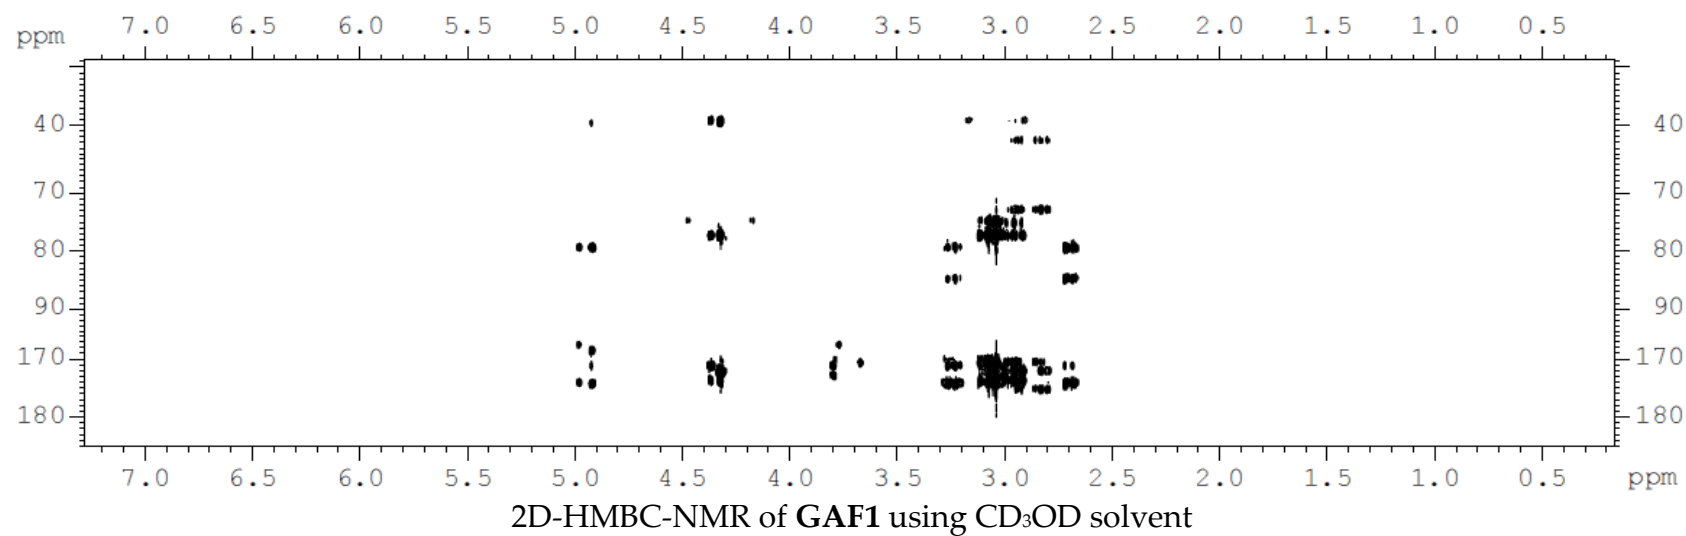

**Figure S1: Spectroscopy data of GAF1**

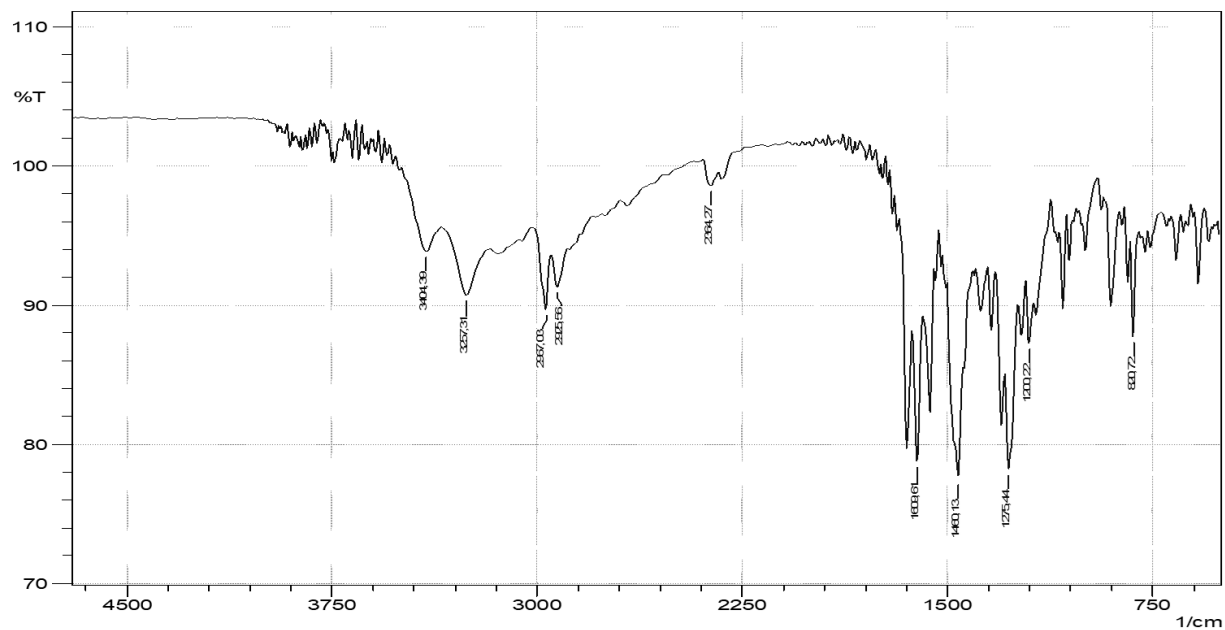

IR spectrum of GAL1 compound that isolated from *G. atroviridis* leaves

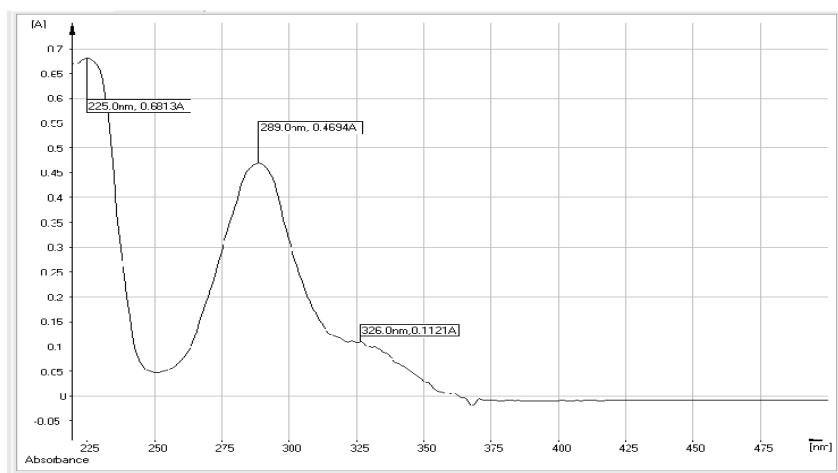

UV spectrum of GAL1 compound that isolated from *G. atroviridis* leaves

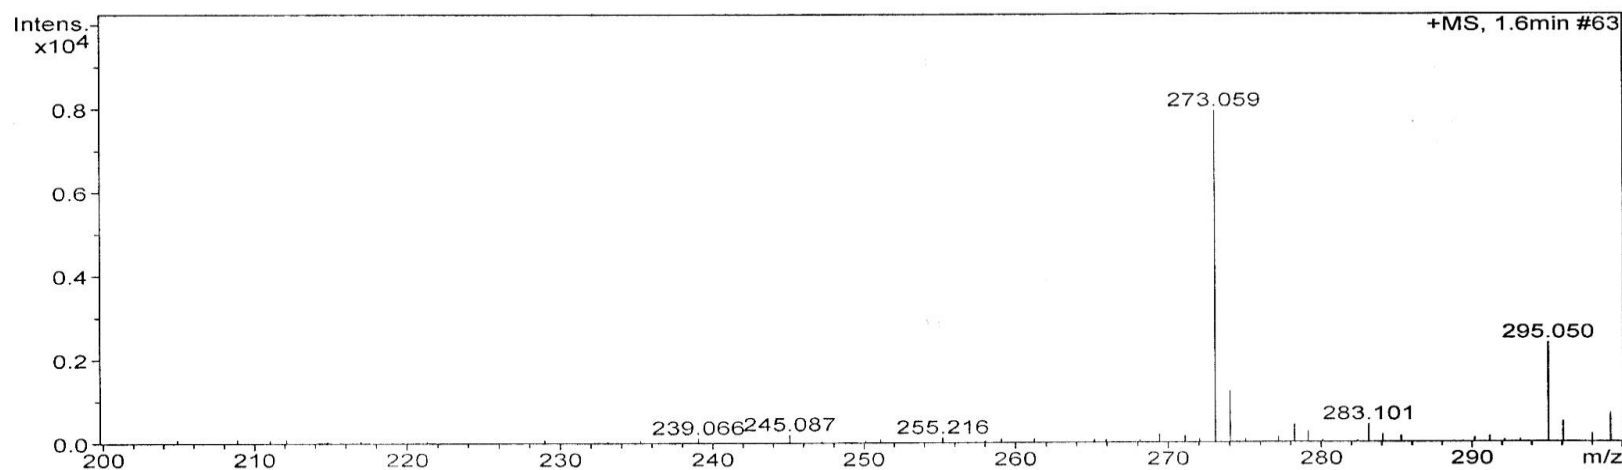

Negative Mode  $[M-H]^+$  of Mass Spectrum Using ESIMS-Trap-Direct Injection in MeOH of GAL1 compound that isolated from *G. atroviridis* leaves

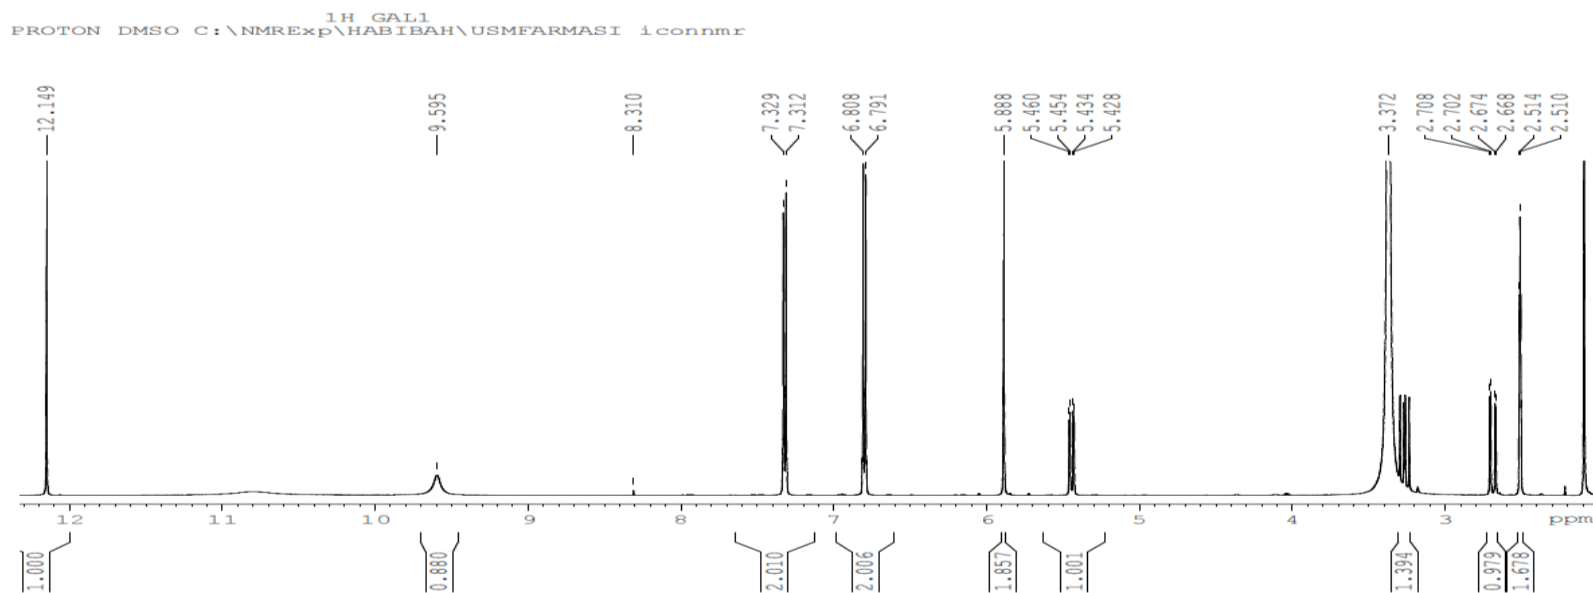

<sup>1</sup>H-NMR spectrum of GAL1 compound that isolated from *G. atroviridis* leaves using DMSO-d<sub>6</sub> solvent

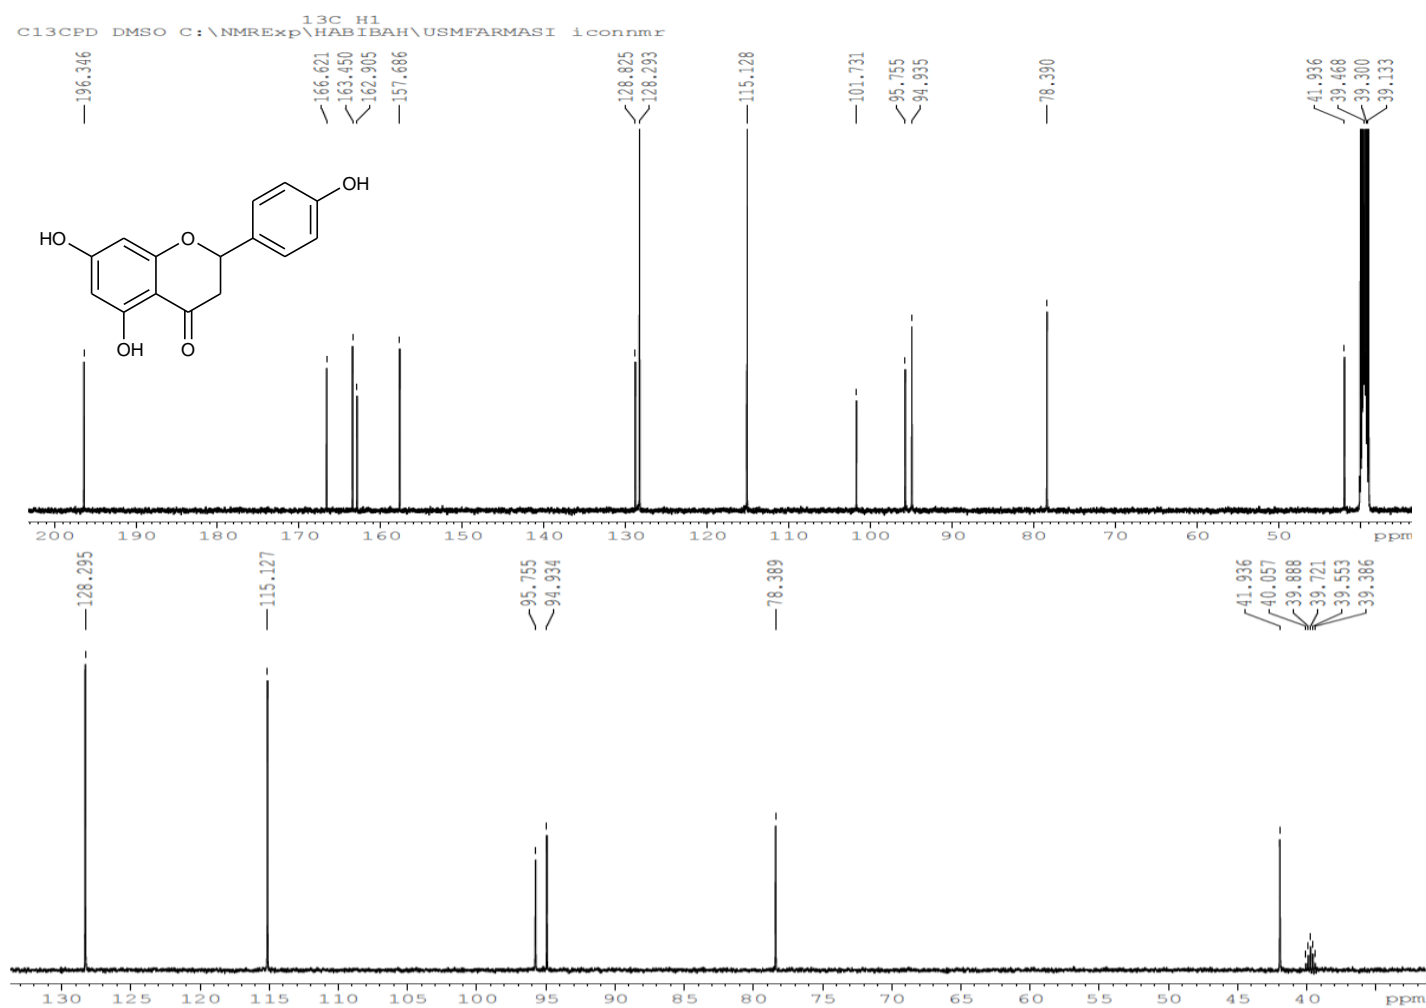

<sup>13</sup>C and DEPT45-NMR (top to bottom) spectrum of GAL1 compound that isolated from *G. atroviridis* leaves using DMSO-d<sub>6</sub> solvent

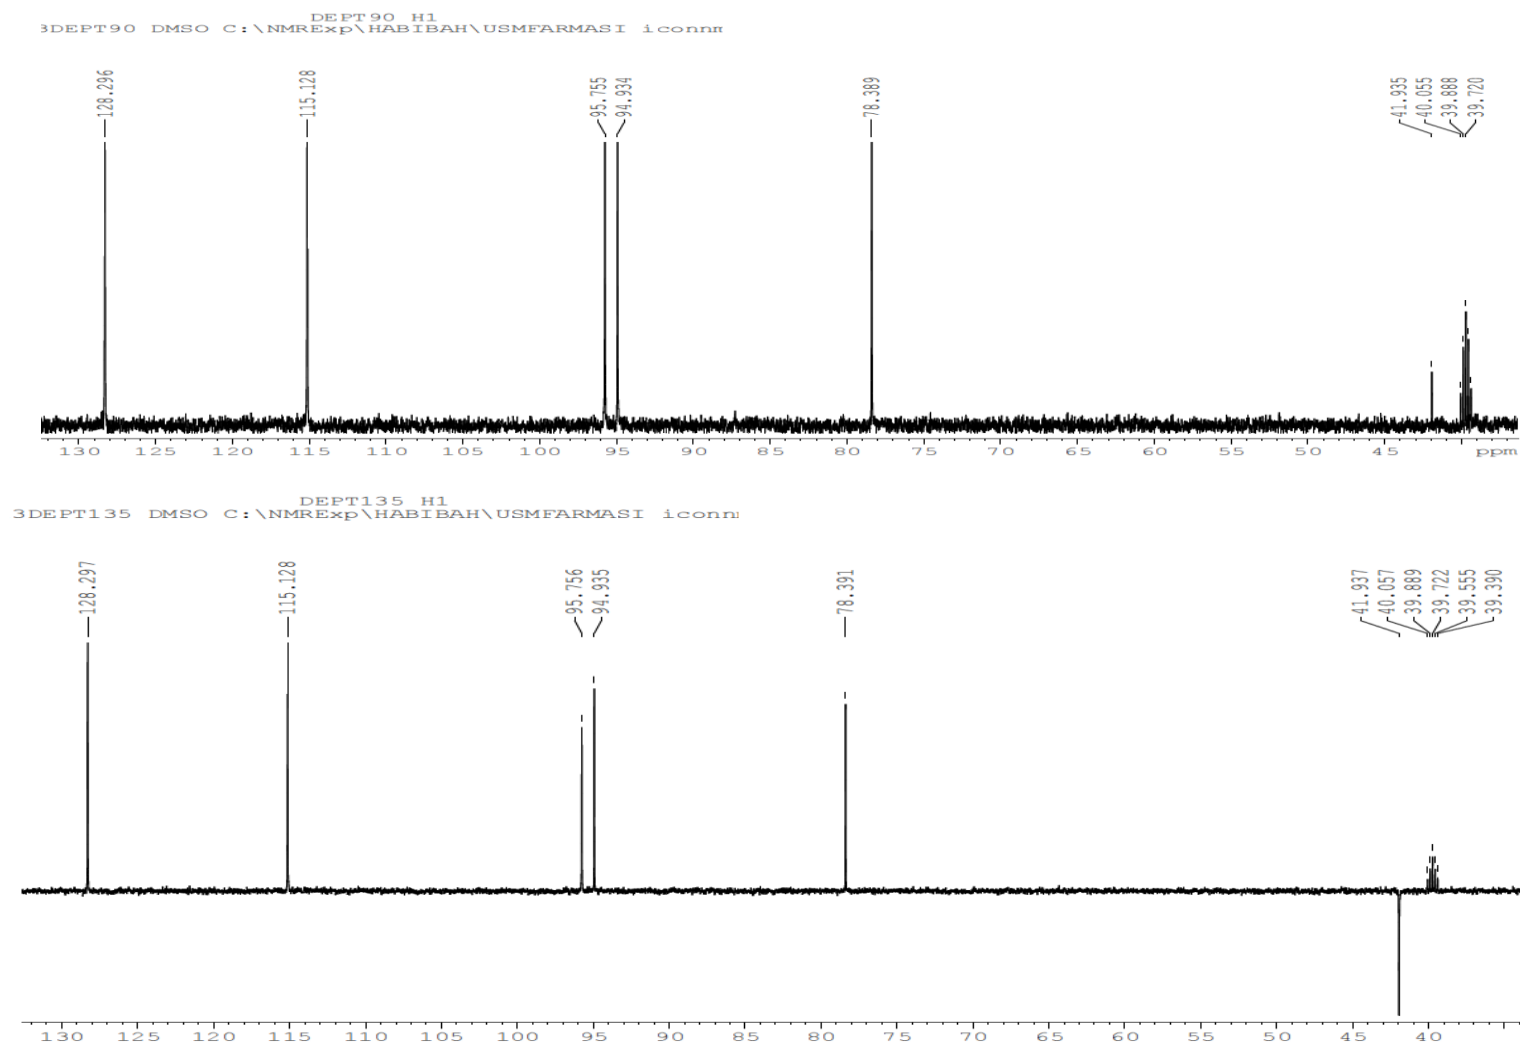

DEPT90 and DEPT135-NMR (top to bottom) spectrum of GAL1 compound that isolated from *G. atroviridis* leaves using DMSO-d<sub>6</sub> solvent

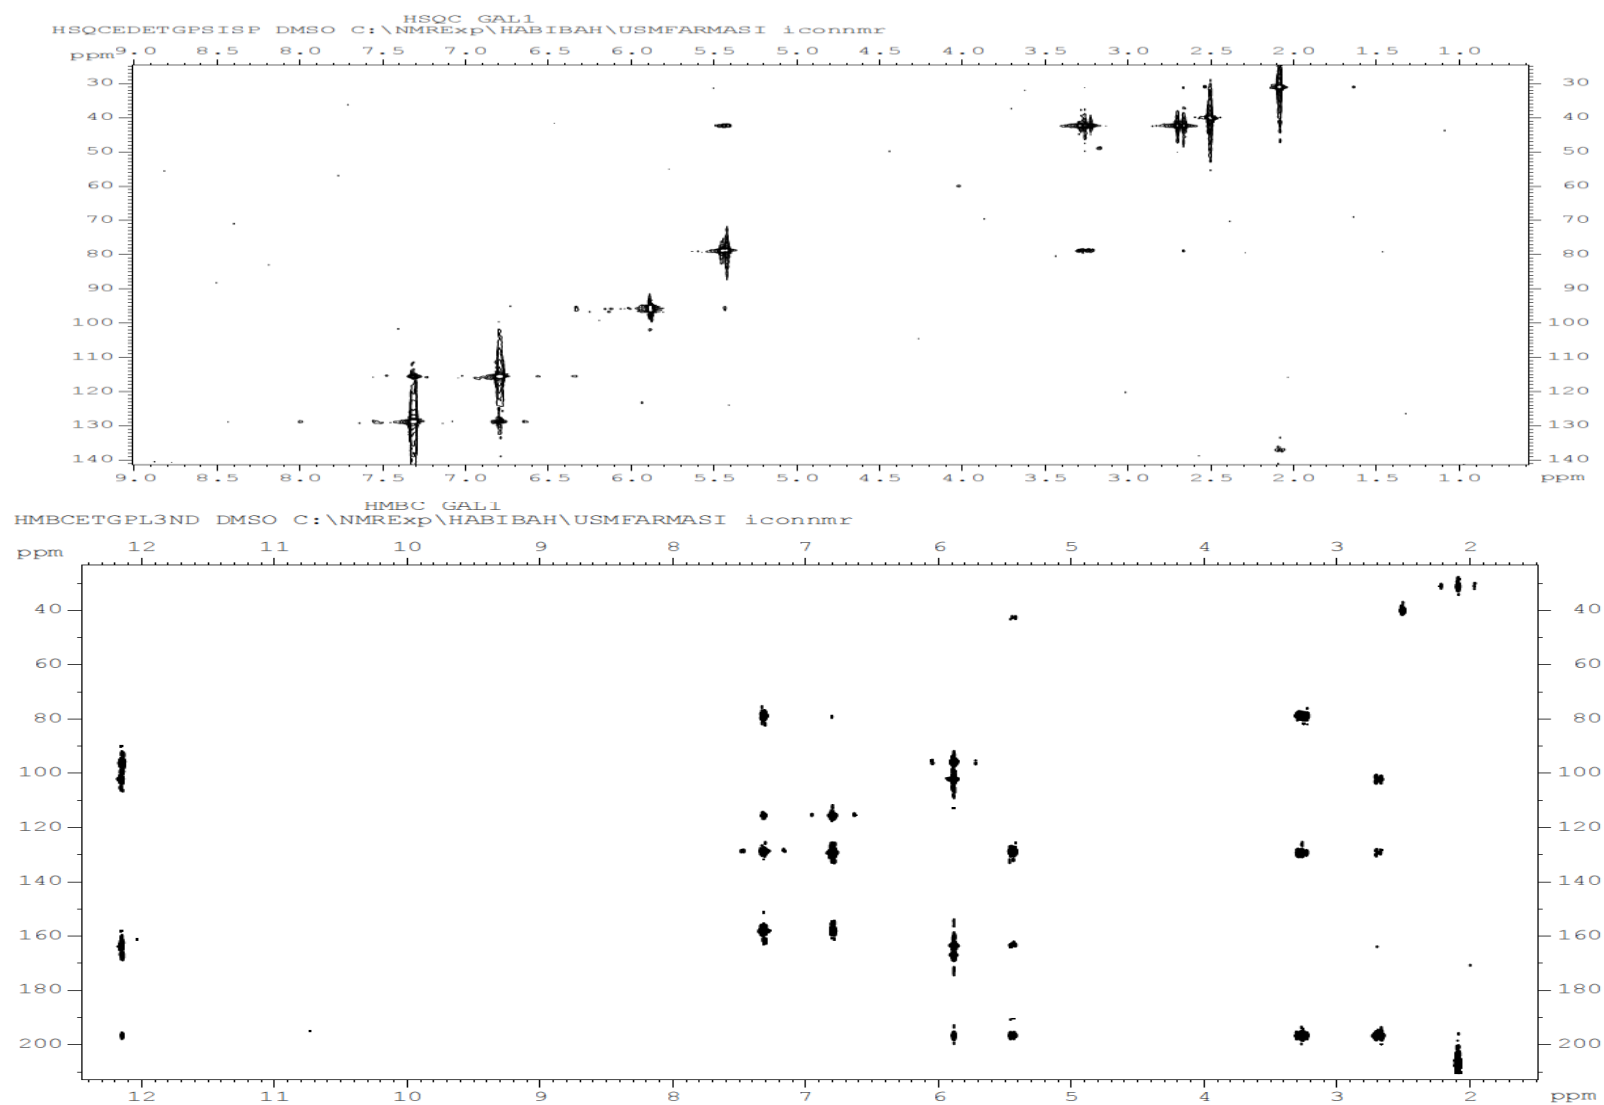

2D-HSQC and 2D-HMBC-NMR of GAL1 using DMSO-d<sub>6</sub> solvent

COSY GAL1  
COSYGPDPFPHSW MeOD C:\NMRExp\HABIBAH\USMFARMASI iconnmr

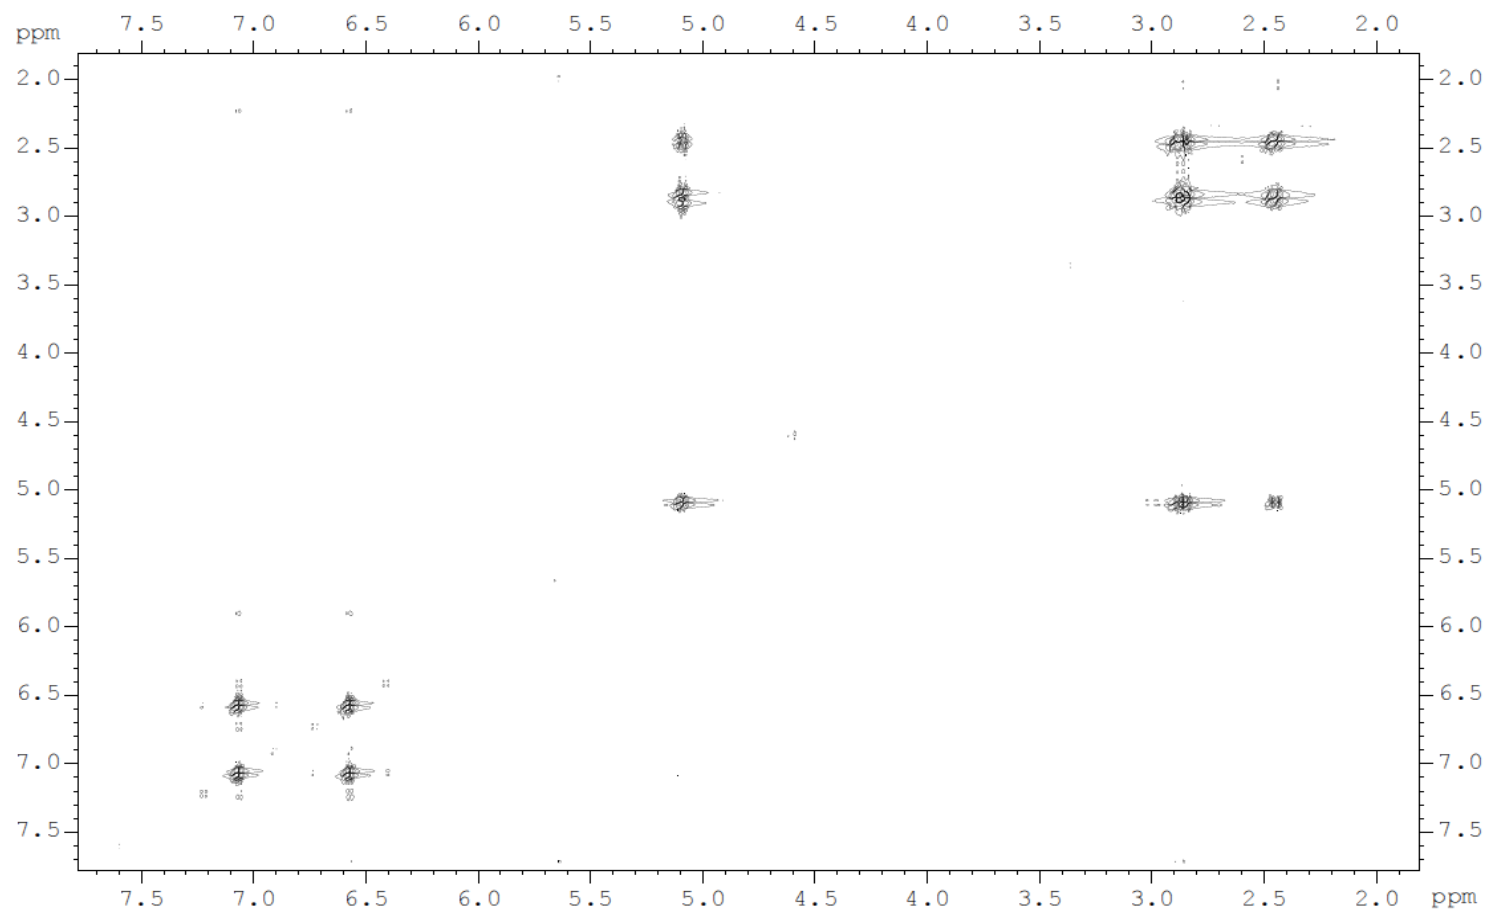

2D-COSY-NMR of GAL1 using DMSO-d<sub>6</sub> solvent

**Figure S2: Spectroscopy data of GAL1**
